# Supplementary material for: Inter-Varietal Variation in Phenolic Profile, Antioxidant, Anti-Inflammatory and Analgesic Activities of Two Brassica rapa Varieties: Influence on Pro-Inflammatory Mediators
Source: MDPI journal article supplement (doi:10.3390/molecules29010117), 2023-12-24

# Single Injection Report

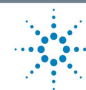

Agilent Technologies

Central Hi-Tech Lab. Governmnet College University  
Faisalabad

Project Name HPLC-Data Instrument Name HPLC-1260  
Sample Name Turnip Phenolics sample 2 Sample Vial Number P1-A2

| Name | RT     | Area      | Peak Area | Percent | Unit | Concentrati<br>on<br>□ |
|------|--------|-----------|-----------|---------|------|------------------------|
| 1    | 2.925  | 22.2191   | 2.63      |         |      |                        |
|      | 2.929  | 36.5001   | 1.02      |         |      |                        |
|      | 2.930  | 133.2810  | 1.68      |         |      |                        |
|      | 2.962  | 119.0644  | 1.73      |         |      |                        |
|      | 2.983  | 171.9104  | 2.51      |         |      |                        |
|      | 3.320  | 146.7718  | 17.39     |         |      |                        |
|      | 3.321  | 1523.0272 | 22.13     |         |      |                        |
|      | 3.325  | 1513.2587 | 19.04     |         |      |                        |
|      | 3.325  | 1333.6959 | 19.47     |         |      |                        |
|      | 3.327  | 376.9227  | 10.52     |         |      |                        |
|      | 3.604  | 58.8307   | 6.97      |         |      |                        |
|      | 3.605  | 528.6407  | 7.72      |         |      |                        |
|      | 3.611  | 172.9207  | 4.82      |         |      |                        |
| 2    | 3.638  | 726.1009  | 10.55     |         |      |                        |
|      | 3.643  | 763.4493  | 9.60      |         |      |                        |
|      | 4.396  | 198.6113  | 2.90      |         |      |                        |
|      | 4.399  | 16.4988   | 0.46      |         |      |                        |
|      | 4.399  | 146.9968  | 2.14      |         |      |                        |
| 3    | 4.400  | 11.3673   | 1.35      |         |      |                        |
|      | 4.402  | 120.3722  | 1.51      |         |      |                        |
|      | 4.582  | 97.5334   | 1.42      |         |      |                        |
|      | 4.599  | 120.8865  | 1.52      |         |      |                        |
|      | 4.702  | 27.9570   | 0.41      |         |      |                        |
|      | 6.088  | 118.3546  | 1.49      |         |      |                        |
|      | 6.088  | 167.3613  | 2.43      |         |      |                        |
|      | 6.751  | 30.9565   | 0.39      |         |      |                        |
| 4    | 9.755  | 164.2925  | 2.40      |         |      |                        |
|      | 12.854 | 116.8401  | 1.47      |         |      |                        |
|      | 13.240 | 34.3998   | 0.43      |         |      |                        |
|      | 13.247 | 546.9751  | 7.95      |         |      |                        |
|      | 13.247 | 754.1395  | 11.01     |         |      |                        |
|      | 14.821 | 59.9551   | 0.75      |         |      |                        |

# Single Injection Report



Agilent Technologies

| Name | RT     | Area     | Peak Area | Percent | Unit | Concentration |
|------|--------|----------|-----------|---------|------|---------------|
|      | 15.873 | 165.5135 | 2.42      |         |      |               |
|      | 15.879 | 55.4794  | 0.81      |         |      |               |
|      | 15.881 | 55.1596  | 0.69      |         |      |               |
|      | 16.502 | 10.6793  | 0.16      |         |      |               |
|      | 18.540 | 102.8566 | 1.29      |         |      |               |
|      | 18.549 | 128.9732 | 1.87      |         |      |               |
|      | 18.559 | 85.7897  | 1.25      |         |      |               |
|      | 19.391 | 49.8447  | 5.91      |         |      |               |
| 5    | 19.391 | 105.7375 | 1.33      |         |      |               |
|      | 19.392 | 98.2904  | 1.43      |         |      |               |
|      | 19.392 | 118.3366 | 3.30      |         |      |               |
|      | 19.393 | 42.6538  | 0.62      |         |      |               |
|      | 20.296 | 89.2865  | 1.12      |         |      |               |
|      | 20.316 | 49.3996  | 0.72      |         |      |               |
|      | 20.317 | 95.1772  | 1.38      |         |      |               |
|      | 21.426 | 39.1468  | 0.57      |         |      |               |
|      | 21.609 | 16.0385  | 0.45      |         |      |               |
|      | 21.902 | 19.4008  | 0.24      |         |      |               |
|      | 22.042 | 110.3417 | 1.61      |         |      |               |
|      | 22.115 | 54.2134  | 0.79      |         |      |               |
|      | 22.117 | 59.7387  | 1.67      |         |      |               |
|      | 22.136 | 24.8850  | 0.31      |         |      |               |
|      | 22.137 | 4.7149   | 0.56      |         |      |               |
|      | 22.375 | 16.8533  | 2.00      |         |      |               |
|      | 22.376 | 19.8144  | 0.29      |         |      |               |
|      | 22.377 | 47.5370  | 1.33      |         |      |               |
|      | 22.377 | 59.7552  | 0.75      |         |      |               |
|      | 22.381 | 10.2720  | 0.15      |         |      |               |
|      | 22.632 | 20.5210  | 0.57      |         |      |               |
|      | 22.636 | 32.6388  | 0.41      |         |      |               |
|      | 22.639 | 10.2812  | 0.15      |         |      |               |
|      | 22.912 | 15.7580  | 0.20      |         |      |               |
|      | 22.919 | 11.6081  | 0.17      |         |      |               |
|      | 23.598 | 115.8502 | 1.68      |         |      |               |
|      | 23.619 | 221.6989 | 3.24      |         |      |               |
|      | 23.620 | 278.0583 | 3.50      |         |      |               |
|      | 23.622 | 435.1079 | 12.14     |         |      |               |

# Single Injection Report



Agilent Technologies

| Name | RT     | Area     | Peak Area | Percent | Unit | Concentration |
|------|--------|----------|-----------|---------|------|---------------|
| 8    | 23.622 | 50.0512  | 5.93      |         |      |               |
|      | 23.919 | 75.3159  | 1.10      |         |      |               |
|      | 23.921 | 63.1750  | 0.92      |         |      |               |
|      | 24.330 | 241.2768 | 28.59     |         |      |               |
|      | 24.330 | 449.4698 | 12.54     |         |      |               |
|      | 24.331 | 489.9120 | 7.12      |         |      |               |
|      | 24.331 | 559.6510 | 7.04      |         |      |               |
|      | 24.332 | 239.9399 | 3.50      |         |      |               |
|      | 24.968 | 114.4004 | 1.44      |         |      |               |
|      | 24.978 | 56.3837  | 0.82      |         |      |               |
|      | 24.980 | 48.7609  | 0.71      |         |      |               |
|      | 25.681 | 11.2048  | 0.31      |         |      |               |
|      | 25.682 | 31.0429  | 0.45      |         |      |               |
|      | 25.687 | 8.4054   | 0.11      |         |      |               |
|      | 26.244 | 10.3342  | 0.15      |         |      |               |
|      | 26.246 | 19.4810  | 0.28      |         |      |               |
|      | 26.440 | 57.3330  | 6.79      |         |      |               |
|      | 26.442 | 93.6389  | 2.61      |         |      |               |
|      | 26.459 | 151.4403 | 1.91      |         |      |               |
|      | 26.475 | 169.8309 | 2.47      |         |      |               |
| 10   | 26.548 | 122.9184 | 1.79      |         |      |               |
|      | 27.361 | 11.8333  | 0.15      |         |      |               |
|      | 27.597 | 75.9499  | 1.10      |         |      |               |
|      | 27.598 | 184.3508 | 2.69      |         |      |               |
|      | 27.607 | 9.4256   | 0.12      |         |      |               |
|      | 28.624 | 57.9838  | 6.87      |         |      |               |
|      | 28.625 | 744.7999 | 20.78     |         |      |               |
|      | 28.625 | 584.7813 | 7.36      |         |      |               |
|      | 28.626 | 458.3463 | 6.69      |         |      |               |
|      | 28.627 | 161.4568 | 2.35      |         |      |               |
|      | 28.912 | 136.3301 | 1.71      |         |      |               |
|      | 28.913 | 156.7290 | 4.37      |         |      |               |
|      | 28.913 | 147.4925 | 2.15      |         |      |               |
|      | 28.915 | 63.3308  | 0.92      |         |      |               |
|      | 28.919 | 15.4120  | 1.83      |         |      |               |
|      | 29.265 | 18.3707  | 0.27      |         |      |               |
|      | 29.476 | 11.5480  | 0.17      |         |      |               |

# Single Injection Report



Agilent Technologies

| Name | RT     | Area     | Peak Area | Percent | Unit | Concentration |
|------|--------|----------|-----------|---------|------|---------------|
|      | 29.516 | 13.3047  | 0.37      |         |      |               |
|      | 29.776 | 7.3538   | 0.11      |         |      |               |
|      | 29.778 | 7.3021   | 0.11      |         |      |               |
|      | 30.555 | 7.0697   | 0.20      |         |      |               |
|      | 30.641 | 70.8763  | 0.89      |         |      |               |
|      | 30.645 | 57.9676  | 0.85      |         |      |               |
|      | 30.646 | 49.2883  | 0.72      |         |      |               |
|      | 30.877 | 9.7219   | 0.27      |         |      |               |
|      | 31.158 | 20.0969  | 2.38      |         |      |               |
|      | 31.159 | 18.7377  | 0.27      |         |      |               |
|      | 31.159 | 124.6844 | 1.57      |         |      |               |
|      | 31.159 | 178.7638 | 4.99      |         |      |               |
|      | 31.161 | 71.8197  | 1.05      |         |      |               |
|      | 31.369 | 20.9004  | 0.31      |         |      |               |
|      | 31.369 | 78.5423  | 2.19      |         |      |               |
|      | 31.371 | 58.0389  | 0.73      |         |      |               |
|      | 31.375 | 41.2146  | 0.60      |         |      |               |
|      | 31.375 | 27.5510  | 3.26      |         |      |               |
|      | 31.588 | 6.9168   | 0.10      |         |      |               |
|      | 31.797 | 94.5137  | 1.38      |         |      |               |
|      | 31.798 | 61.2333  | 0.89      |         |      |               |
|      | 31.799 | 46.6347  | 0.59      |         |      |               |
|      | 31.818 | 37.9121  | 1.06      |         |      |               |
| 11   | 32.850 | 277.1994 | 3.49      |         |      |               |
|      | 32.850 | 324.2721 | 9.05      |         |      |               |
|      | 32.851 | 176.8897 | 2.58      |         |      |               |
|      | 32.851 | 44.9837  | 5.33      |         |      |               |
|      | 32.853 | 71.8306  | 1.04      |         |      |               |
|      | 33.204 | 5.1271   | 0.07      |         |      |               |
|      | 33.206 | 10.8625  | 0.16      |         |      |               |
|      | 33.376 | 12.7960  | 0.36      |         |      |               |
|      | 33.727 | 13.9856  | 0.20      |         |      |               |
|      | 33.734 | 34.9446  | 0.51      |         |      |               |
|      | 33.736 | 33.5244  | 0.42      |         |      |               |
|      | 33.849 | 5.6627   | 0.16      |         |      |               |
|      | 34.018 | 14.7505  | 0.41      |         |      |               |
|      | 34.023 | 38.6791  | 0.49      |         |      |               |

# Single Injection Report



Agilent Technologies

| Name | RT     | Area     | Peak Area | Percent | Unit | Concentration |
|------|--------|----------|-----------|---------|------|---------------|
|      | 34.024 | 36.1906  | 0.53      |         |      |               |
|      | 34.025 | 18.7460  | 2.22      |         |      |               |
|      | 34.026 | 60.7849  | 0.88      |         |      |               |
|      | 34.318 | 15.5189  | 0.23      |         |      |               |
|      | 34.324 | 14.4432  | 0.21      |         |      |               |
|      | 34.539 | 10.8929  | 0.30      |         |      |               |
|      | 35.172 | 36.9400  | 0.54      |         |      |               |
|      | 35.176 | 17.2126  | 0.25      |         |      |               |
|      | 35.182 | 17.8546  | 0.22      |         |      |               |
|      | 35.187 | 29.6224  | 0.83      |         |      |               |
|      | 35.355 | 24.1289  | 0.67      |         |      |               |
|      | 36.655 | 241.0196 | 3.50      |         |      |               |
|      | 36.661 | 180.6851 | 2.64      |         |      |               |
| 12   | 36.666 | 133.3065 | 1.68      |         |      |               |
|      | 36.682 | 53.8487  | 1.50      |         |      |               |
|      | 37.767 | 27.3345  | 0.40      |         |      |               |
|      | 37.969 | 16.7545  | 0.24      |         |      |               |
|      | 37.972 | 57.9535  | 0.73      |         |      |               |
|      | 38.904 | 10.3546  | 0.15      |         |      |               |
|      | 38.905 | 10.1969  | 0.13      |         |      |               |
|      | 38.905 | 16.7984  | 0.24      |         |      |               |
|      | 40.416 | 17.0191  | 0.21      |         |      |               |
|      | 42.106 | 66.1868  | 0.96      |         |      |               |
|      | 42.106 | 63.6778  | 0.93      |         |      |               |
|      | 42.107 | 32.7640  | 0.41      |         |      |               |
|      | 44.213 | 13.1638  | 0.37      |         |      |               |
|      | 44.214 | 42.1682  | 0.62      |         |      |               |
|      | 44.214 | 11.2608  | 0.16      |         |      |               |
|      | 46.177 | 17.2734  | 0.22      |         |      |               |
|      | 46.682 | 14.0096  | 0.39      |         |      |               |
|      | 46.812 | 33.5976  | 0.49      |         |      |               |
|      | 46.822 | 69.6798  | 0.88      |         |      |               |
|      | 47.649 | 74.2432  | 0.93      |         |      |               |
|      | 49.721 | 14.2765  | 0.21      |         |      |               |
|      | 50.051 | 21.0317  | 0.26      |         |      |               |
|      | 50.057 | 18.3012  | 0.27      |         |      |               |
|      | 51.982 | 81.5432  | 1.03      |         |      |               |

# Single Injection Report



Agilent Technologies

| Name | RT     | Area     | Peak Area | Percent | Unit | Concentration |
|------|--------|----------|-----------|---------|------|---------------|
|      | 52.644 | 87.0812  | 1.10      |         |      |               |
|      | 52.981 | 34.5677  | 0.43      |         |      |               |
|      | 53.195 | 22.8815  | 0.29      |         |      |               |
|      | 53.871 | 35.3354  | 0.52      |         |      |               |
|      | 53.872 | 11.0187  | 0.14      |         |      |               |
|      | 53.872 | 35.2579  | 0.51      |         |      |               |
| 13   | 54.204 | 165.1501 | 2.08      |         |      |               |
|      | 54.207 | 234.2433 | 3.42      |         |      |               |
|      | 54.207 | 313.2586 | 4.55      |         |      |               |
|      | 54.544 | 9.2489   | 0.13      |         |      |               |
| 14   | 54.812 | 607.3317 | 7.64      |         |      |               |
|      | 54.813 | 69.4235  | 1.01      |         |      |               |
|      | 54.813 | 65.0335  | 0.94      |         |      |               |
|      | 55.129 | 105.5268 | 1.33      |         |      |               |
|      | 55.854 | 9.3828   | 0.12      |         |      |               |
|      | 55.870 | 19.8900  | 0.29      |         |      |               |
|      | 55.871 | 26.3733  | 0.38      |         |      |               |
|      | 56.207 | 8.4312   | 0.11      |         |      |               |
|      | 56.210 | 31.4079  | 0.46      |         |      |               |
|      | 56.211 | 33.0158  | 0.48      |         |      |               |
|      | 56.696 | 111.8814 | 1.63      |         |      |               |
|      | 56.697 | 51.1440  | 0.64      |         |      |               |
|      | 56.697 | 151.5207 | 2.20      |         |      |               |
|      | 57.235 | 60.5596  | 0.76      |         |      |               |
|      | 57.507 | 13.9572  | 0.18      |         |      |               |
|      | 57.671 | 25.3004  | 0.32      |         |      |               |
|      | 58.174 | 33.2544  | 0.42      |         |      |               |
|      | 58.194 | 29.3119  | 0.43      |         |      |               |
|      | 58.195 | 31.2043  | 0.45      |         |      |               |
|      | 58.404 | 78.4923  | 0.99      |         |      |               |
|      | 58.404 | 147.4410 | 2.15      |         |      |               |
|      | 58.405 | 208.1412 | 3.02      |         |      |               |
|      | 59.333 | 11.5068  | 0.14      |         |      |               |
|      | 59.851 | 7.4903   | 0.09      |         |      |               |
|      | 60.002 | 12.7056  | 0.19      |         |      |               |
|      | 60.003 | 19.9202  | 0.29      |         |      |               |
|      | 60.136 | 19.4254  | 0.28      |         |      |               |

# Single Injection Report



**Agilent Technologies**

| Name | RT     | Area    | Peak Area | Percent | Unit | Concentration |
|------|--------|---------|-----------|---------|------|---------------|
|      | 60.137 | 17.3635 | 0.25      |         |      | □             |
|      | 60.466 | 56.0915 | 0.82      |         |      |               |
|      | 60.466 | 83.4872 | 1.21      |         |      |               |
|      | 60.467 | 30.6823 | 0.39      |         |      |               |
|      | 60.923 | 31.7110 | 0.40      |         |      |               |
|      | 61.390 | 7.1724  | 0.10      |         |      |               |
|      | 61.398 | 12.1694 | 0.18      |         |      |               |

# Single Injection Report



Agilent Technologies

MWD1A,Sig=250,4 Ref=off

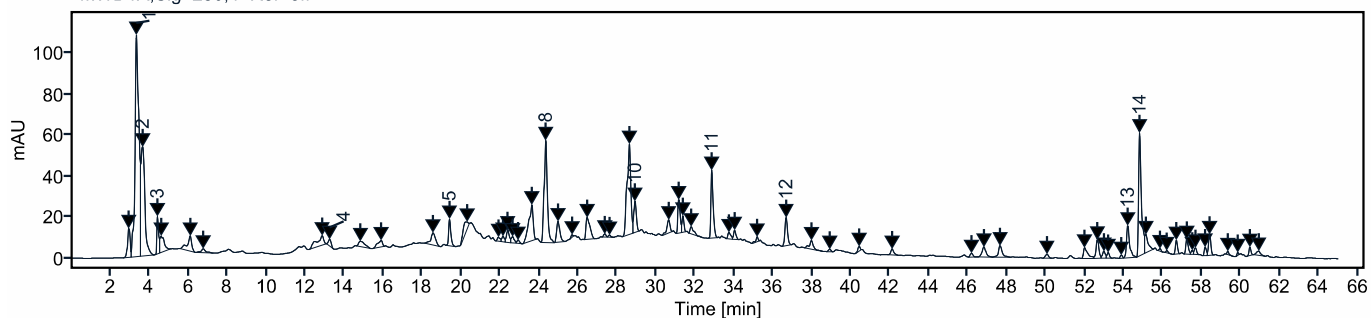

MWD1B,Sig=270,4 Ref=off

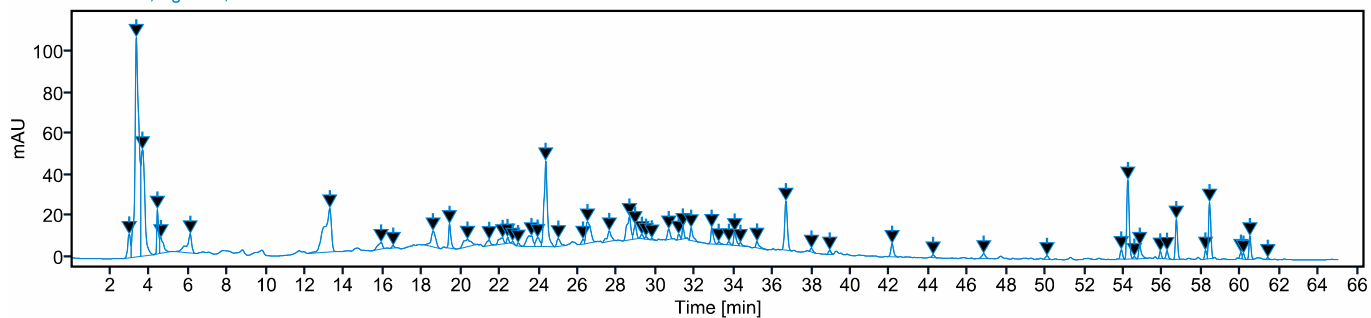

MWD1C,Sig=290,4 Ref=off

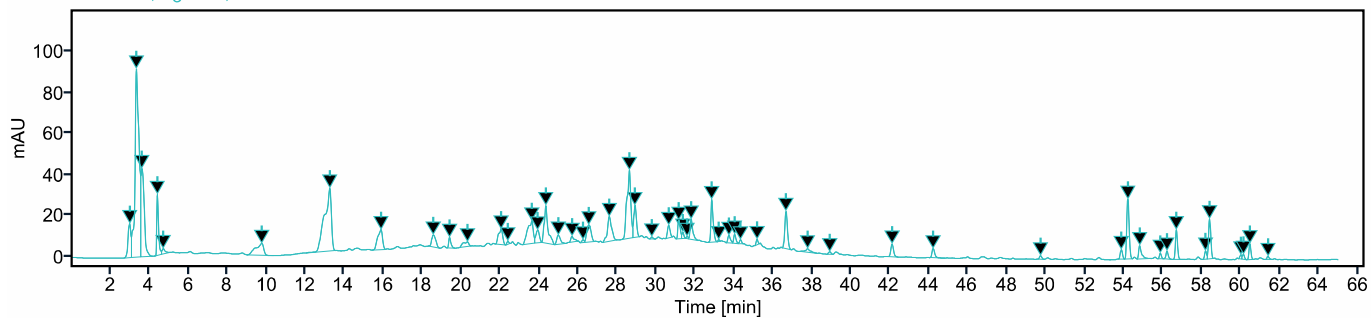

MWD1D,Sig=350,4 Ref=off

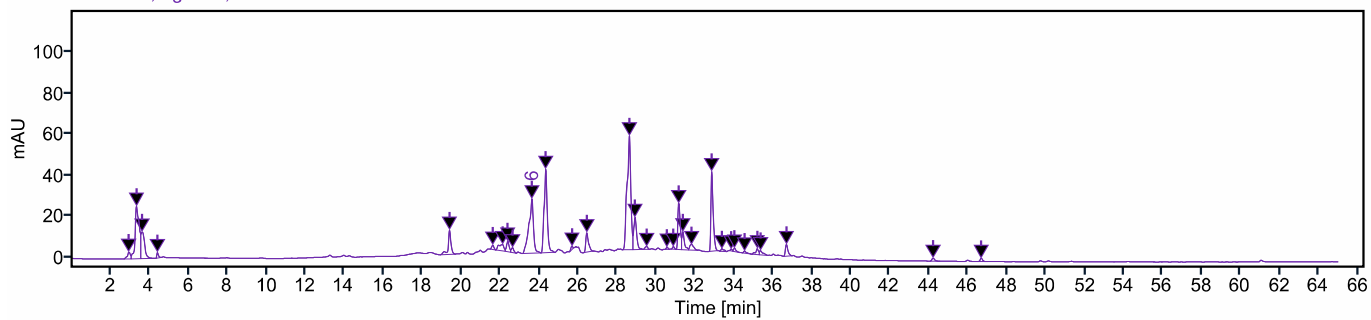

MWD1E,Sig=380,4 Ref=off

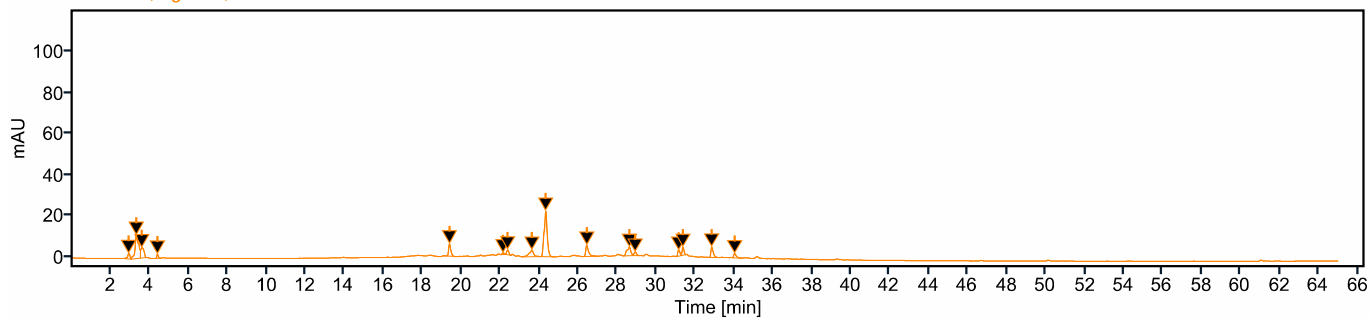



# Single Injection Report



Agilent Technologies

Central Hi-Tech Lab. Governmnet College University  
Faisalabad

|              |                           |                    |           |
|--------------|---------------------------|--------------------|-----------|
| Project Name | HPLC-Data                 | Instrument Name    | HPLC-1260 |
| Sample Name  | Turnip Phenolics sample 1 | Sample Vial Number | P1-A1     |

| Name | RT     | Area      | Peak Area | Percent | Unit | Concentration |
|------|--------|-----------|-----------|---------|------|---------------|
|      | 0.080  | 10.1940   | 0.95      |         |      |               |
|      | 0.080  | 10.4170   | 2.56      |         |      |               |
|      | 0.086  | 34.1331   | 0.67      |         |      |               |
|      | 0.089  | 34.1243   | 0.67      |         |      |               |
|      | 0.091  | 55.2761   | 1.18      |         |      |               |
|      | 2.876  | 31.1574   | 7.65      |         |      |               |
|      | 2.883  | 300.8134  | 5.91      |         |      |               |
|      | 2.883  | 969.7897  | 18.93     |         |      |               |
|      | 2.885  | 250.7194  | 5.34      |         |      |               |
|      | 3.032  | 298.3085  | 5.86      |         |      |               |
|      | 3.186  | 2744.8635 | 53.92     |         |      |               |
|      | 3.186  | 770.4768  | 71.87     |         |      |               |
|      | 3.187  | 2115.9557 | 45.04     |         |      |               |
|      | 3.187  | 2260.0976 | 44.11     |         |      |               |
|      | 3.187  | 311.0624  | 76.38     |         |      |               |
|      | 3.932  | 21.8408   | 5.36      |         |      |               |
|      | 3.933  | 34.5940   | 3.23      |         |      |               |
|      | 3.935  | 171.1526  | 3.34      |         |      |               |
|      | 3.936  | 199.1467  | 3.91      |         |      |               |
|      | 3.937  | 244.7090  | 5.21      |         |      |               |
|      | 4.217  | 78.1056   | 1.52      |         |      |               |
|      | 4.255  | 196.0910  | 3.85      |         |      |               |
|      | 4.262  | 140.8696  | 3.00      |         |      |               |
|      | 9.106  | 82.2875   | 1.62      |         |      |               |
|      | 9.107  | 222.6588  | 4.35      |         |      |               |
|      | 11.341 | 69.4409   | 1.48      |         |      |               |
|      | 12.856 | 32.3772   | 0.69      |         |      |               |
|      | 12.861 | 208.0665  | 4.09      |         |      |               |
|      | 12.862 | 270.6974  | 5.28      |         |      |               |
|      | 15.673 | 83.2654   | 1.77      |         |      |               |
|      | 15.675 | 181.4576  | 3.54      |         |      |               |
|      | 15.677 | 63.9260   | 1.26      |         |      |               |

# Single Injection Report



Agilent Technologies

| Name | RT     | Area    | Peak Area | Percent | Unit | Concentration |
|------|--------|---------|-----------|---------|------|---------------|
|      | 18.375 | 8.2427  | 0.16      |         |      |               |
|      | 18.376 | 17.5304 | 0.37      |         |      |               |
|      | 19.299 | 14.7322 | 1.37      |         |      |               |
|      | 20.177 | 53.4880 | 1.14      |         |      |               |
|      | 20.187 | 53.5978 | 1.05      |         |      |               |
|      | 20.224 | 47.9138 | 0.94      |         |      |               |
|      | 20.467 | 12.5591 | 0.25      |         |      |               |
|      | 21.364 | 18.4506 | 0.36      |         |      |               |
|      | 21.365 | 19.2790 | 0.41      |         |      |               |
|      | 22.498 | 18.7812 | 0.37      |         |      |               |
|      | 23.321 | 9.3900  | 0.88      |         |      |               |
|      | 23.509 | 42.6589 | 0.84      |         |      |               |
|      | 23.535 | 35.0304 | 0.75      |         |      |               |
| 6    | 23.565 | 11.0937 | 1.03      |         |      |               |
|      | 23.841 | 18.4826 | 0.39      |         |      |               |
|      | 23.849 | 34.6234 | 0.68      |         |      |               |
|      | 23.850 | 55.7617 | 1.09      |         |      |               |
|      | 24.287 | 54.9700 | 5.13      |         |      |               |
|      | 24.288 | 32.7606 | 8.04      |         |      |               |
|      | 24.288 | 51.3571 | 1.01      |         |      |               |
|      | 24.289 | 21.5337 | 0.42      |         |      |               |
| 8    | 24.291 | 76.4002 | 1.63      |         |      |               |
|      | 24.969 | 9.3068  | 0.18      |         |      |               |
|      | 24.972 | 7.8337  | 0.17      |         |      |               |
|      | 24.977 | 15.2988 | 0.30      |         |      |               |
|      | 26.170 | 10.6269 | 0.21      |         |      |               |
|      | 26.174 | 15.3998 | 0.30      |         |      |               |
|      | 26.481 | 14.9058 | 0.29      |         |      |               |
|      | 26.852 | 22.8987 | 0.45      |         |      |               |
|      | 27.596 | 23.8179 | 0.46      |         |      |               |
|      | 27.600 | 11.5125 | 0.23      |         |      |               |
|      | 28.579 | 16.8539 | 0.33      |         |      |               |
|      | 28.579 | 56.6084 | 1.10      |         |      |               |
|      | 28.581 | 74.8881 | 6.99      |         |      |               |
|      | 28.581 | 56.9407 | 1.21      |         |      |               |
| 10   | 28.864 | 20.6622 | 0.44      |         |      |               |
|      | 28.867 | 24.3343 | 0.47      |         |      |               |

# Single Injection Report



Agilent Technologies

| Name | RT     | Area     | Peak Area | Percent | Unit | Concentration |
|------|--------|----------|-----------|---------|------|---------------|
|      | 28.867 | 24.2501  | 2.26      |         |      |               |
|      | 30.592 | 68.7148  | 1.35      |         |      |               |
|      | 30.593 | 82.7966  | 1.76      |         |      |               |
|      | 30.594 | 81.7650  | 1.60      |         |      |               |
|      | 31.128 | 10.7777  | 0.23      |         |      |               |
|      | 31.129 | 15.7658  | 1.47      |         |      |               |
|      | 31.757 | 30.9725  | 0.66      |         |      |               |
|      | 31.761 | 113.1464 | 2.21      |         |      |               |
|      | 31.762 | 70.5095  | 1.39      |         |      |               |
| 11   | 32.822 | 28.1255  | 0.60      |         |      |               |
|      | 32.824 | 37.7001  | 3.52      |         |      |               |
|      | 32.826 | 17.9218  | 0.35      |         |      |               |
|      | 32.834 | 11.9081  | 0.23      |         |      |               |
|      | 33.177 | 18.3064  | 0.36      |         |      |               |
|      | 33.178 | 16.4511  | 0.32      |         |      |               |
|      | 33.959 | 13.6397  | 0.29      |         |      |               |
|      | 34.285 | 12.5368  | 0.25      |         |      |               |
|      | 34.287 | 23.9668  | 0.47      |         |      |               |
|      | 36.605 | 233.8079 | 4.59      |         |      |               |
|      | 36.606 | 158.9857 | 3.10      |         |      |               |
| 12   | 36.609 | 102.9582 | 2.19      |         |      |               |
|      | 36.636 | 13.9784  | 1.30      |         |      |               |
|      | 37.922 | 18.4959  | 0.39      |         |      |               |
|      | 38.856 | 19.2226  | 0.41      |         |      |               |
|      | 38.857 | 18.7824  | 0.37      |         |      |               |
|      | 38.858 | 29.8754  | 0.59      |         |      |               |
|      | 40.376 | 40.7609  | 0.87      |         |      |               |
|      | 42.065 | 49.4753  | 0.97      |         |      |               |
|      | 42.065 | 23.1185  | 0.49      |         |      |               |
|      | 42.065 | 52.1518  | 1.02      |         |      |               |
|      | 44.174 | 26.0713  | 0.51      |         |      |               |
|      | 46.134 | 15.5823  | 0.33      |         |      |               |
|      | 46.786 | 42.2692  | 0.90      |         |      |               |
|      | 47.604 | 57.3953  | 1.22      |         |      |               |
|      | 51.953 | 65.4231  | 1.39      |         |      |               |
|      | 52.613 | 23.0406  | 0.49      |         |      |               |
|      | 52.951 | 14.5731  | 0.31      |         |      |               |

# Single Injection Report



Agilent Technologies

| Name | RT     | Area     | Peak Area | Percent | Unit | Concentration |
|------|--------|----------|-----------|---------|------|---------------|
| 13   | 53.168 | 8.4813   | 0.18      |         |      |               |
|      | 54.173 | 54.2934  | 1.16      |         |      |               |
|      | 54.184 | 45.8614  | 0.90      |         |      |               |
| 14   | 54.185 | 61.0454  | 1.20      |         |      |               |
|      | 54.792 | 683.8482 | 14.55     |         |      |               |
|      | 54.793 | 73.8918  | 1.44      |         |      |               |
|      | 54.793 | 65.6034  | 1.29      |         |      |               |
|      | 55.852 | 6.0928   | 0.12      |         |      |               |
|      | 55.852 | 8.1320   | 0.16      |         |      |               |
|      | 56.677 | 9.9203   | 0.21      |         |      |               |
|      | 56.678 | 19.8111  | 0.39      |         |      |               |
|      | 56.678 | 27.0131  | 0.53      |         |      |               |
|      | 58.143 | 27.4284  | 0.58      |         |      |               |
|      | 59.835 | 12.1948  | 0.26      |         |      |               |
|      | 60.918 | 14.8903  | 0.32      |         |      |               |

# Single Injection Report

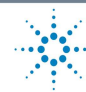

Agilent Technologies

MWD1A,Sig=250,4 Ref=off

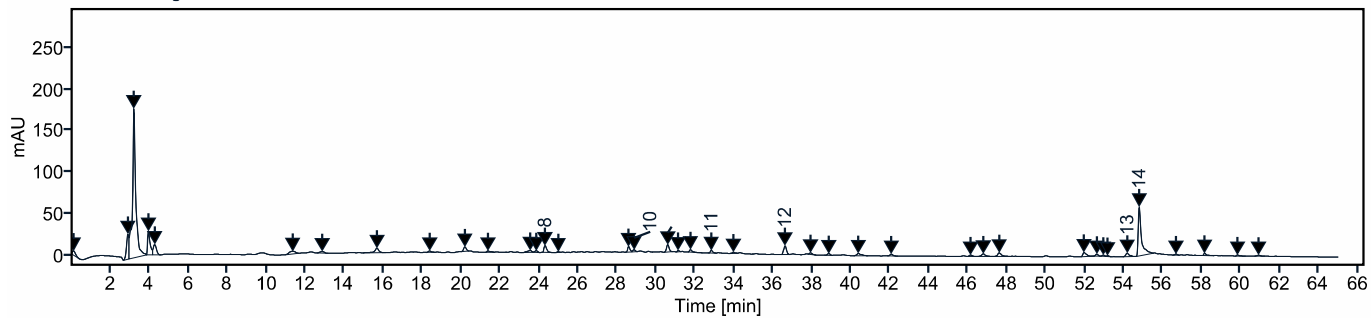

MWD1B,Sig=270,4 Ref=off

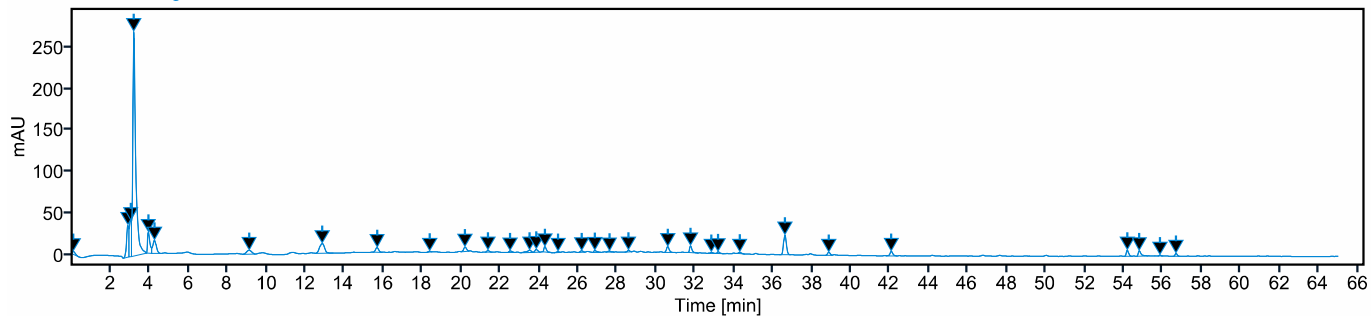

MWD1C,Sig=290,4 Ref=off

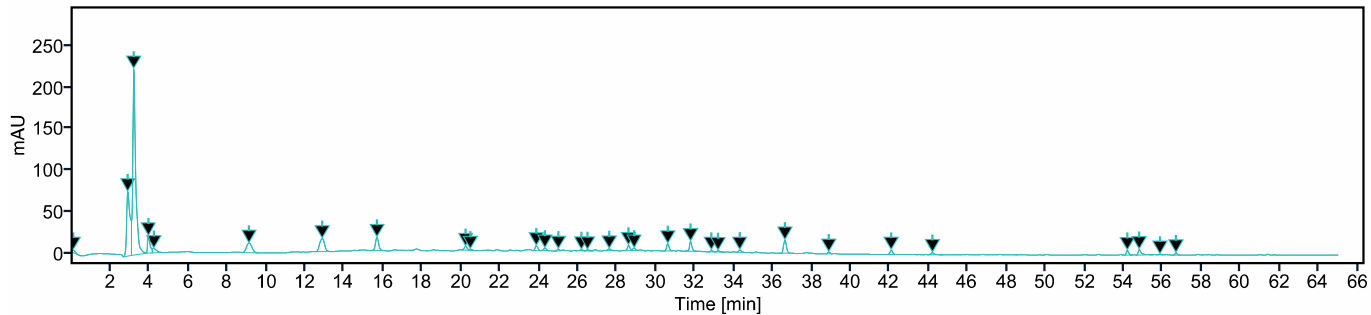

MWD1D,Sig=350,4 Ref=off

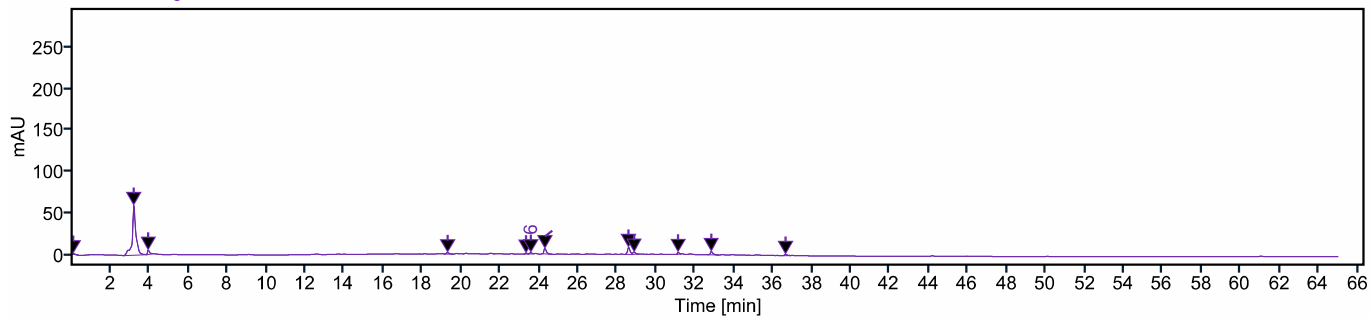

MWD1E,Sig=380,4 Ref=off

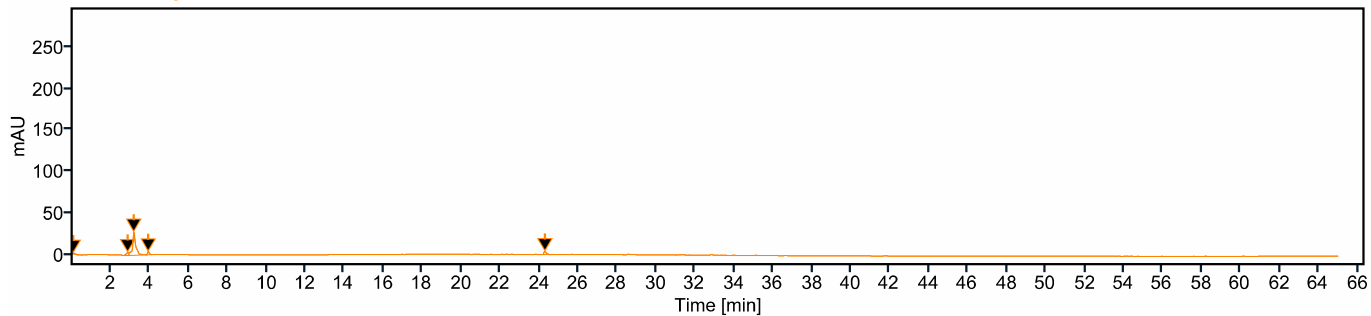

# Single Injection Report



Agilent Technologies

Central Hi-Tech Lab. Governmnet College University  
Faisalabad

Project Name HPLC-Data Instrument Name HPLC-1260  
Sample Name Turnip Phenolics sample 3 Sample Vial Number P1-A3

| Name | RT    | Area      | Peak Area | Percent | Unit | Concentrati<br>on<br>□ |
|------|-------|-----------|-----------|---------|------|------------------------|
| 1    | 2.933 | 18.4164   | 3.87      |         |      |                        |
|      | 2.935 | 133.0012  | 2.96      |         |      |                        |
|      | 3.005 | 14.2238   | 1.67      |         |      |                        |
|      | 3.013 | 62.8326   | 1.17      |         |      |                        |
|      | 3.024 | 100.0180  | 1.78      |         |      |                        |
|      | 3.322 | 227.1821  | 47.75     |         |      |                        |
|      | 3.323 | 1201.9117 | 26.71     |         |      |                        |
|      | 3.323 | 1251.0715 | 22.28     |         |      |                        |
|      | 3.324 | 432.9164  | 50.77     |         |      |                        |
|      | 3.325 | 1465.0216 | 27.25     |         |      |                        |
|      | 3.518 | 296.8607  | 5.29      |         |      |                        |
|      | 3.522 | 126.6259  | 14.85     |         |      |                        |
|      | 3.524 | 74.0984   | 15.57     |         |      |                        |
|      | 3.526 | 313.3724  | 5.83      |         |      |                        |
|      | 3.529 | 308.5757  | 6.86      |         |      |                        |
|      | 3.615 | 590.4006  | 10.51     |         |      |                        |
|      | 3.624 | 247.2091  | 28.99     |         |      |                        |
| 2    | 3.624 | 142.2774  | 29.90     |         |      |                        |
|      | 3.626 | 825.4728  | 15.35     |         |      |                        |
|      | 3.628 | 801.3194  | 17.80     |         |      |                        |
|      | 4.406 | 141.3995  | 2.52      |         |      |                        |
|      | 4.408 | 20.6891   | 2.43      |         |      |                        |
|      | 4.409 | 13.8412   | 2.91      |         |      |                        |
| 3    | 4.410 | 192.1283  | 3.57      |         |      |                        |
|      | 4.413 | 154.2668  | 3.43      |         |      |                        |
|      | 4.681 | 112.2400  | 2.49      |         |      |                        |
|      | 4.683 | 94.1860   | 1.75      |         |      |                        |
|      | 4.726 | 11.3554   | 0.20      |         |      |                        |
|      | 6.255 | 49.7648   | 1.11      |         |      |                        |
|      | 6.255 | 69.8084   | 1.30      |         |      |                        |
|      | 8.868 | 63.5794   | 1.18      |         |      |                        |
|      | 9.839 | 270.9656  | 4.83      |         |      |                        |

# Single Injection Report



Agilent Technologies

| Name | RT     | Area      | Peak Area | Percent | Unit | Concentration |
|------|--------|-----------|-----------|---------|------|---------------|
|      | 9.839  | 29.1615   | 0.54      |         |      |               |
|      | 11.652 | 34.1563   | 0.64      |         |      |               |
|      | 11.653 | 40.0921   | 0.89      |         |      |               |
|      | 13.285 | 297.7824  | 6.62      |         |      |               |
|      | 13.292 | 1931.3670 | 34.39     |         |      |               |
| 4    | 13.292 | 1306.8191 | 24.30     |         |      |               |
|      | 14.668 | 51.1434   | 0.95      |         |      |               |
|      | 15.903 | 108.3426  | 1.93      |         |      |               |
|      | 15.905 | 39.4806   | 0.88      |         |      |               |
|      | 20.353 | 69.5240   | 1.24      |         |      |               |
|      | 22.053 | 32.7977   | 0.58      |         |      |               |
|      | 23.483 | 34.6186   | 0.64      |         |      |               |
| 7    | 23.938 | 38.5954   | 0.69      |         |      |               |
|      | 23.939 | 17.3902   | 0.32      |         |      |               |
| 8    | 24.764 | 12.8520   | 0.29      |         |      |               |
|      | 24.975 | 30.5982   | 0.57      |         |      |               |
|      | 25.003 | 11.4010   | 0.20      |         |      |               |
|      | 25.532 | 11.6599   | 0.21      |         |      |               |
|      | 26.250 | 16.6855   | 0.31      |         |      |               |
|      | 26.251 | 12.4519   | 0.22      |         |      |               |
|      | 27.612 | 44.9525   | 0.84      |         |      |               |
| 9    | 27.613 | 84.1694   | 1.50      |         |      |               |
|      | 29.656 | 15.3395   | 0.27      |         |      |               |
|      | 29.657 | 14.2017   | 0.26      |         |      |               |
| 10   | 29.660 | 29.6545   | 0.66      |         |      |               |
|      | 30.656 | 67.0255   | 1.49      |         |      |               |
|      | 30.656 | 53.4195   | 0.99      |         |      |               |
|      | 30.657 | 71.7533   | 1.28      |         |      |               |
|      | 30.946 | 18.2383   | 0.32      |         |      |               |
|      | 31.802 | 11.0830   | 0.25      |         |      |               |
|      | 31.804 | 46.2881   | 0.82      |         |      |               |
|      | 31.805 | 34.9636   | 0.65      |         |      |               |
|      | 34.021 | 16.5816   | 0.37      |         |      |               |
|      | 34.333 | 16.7154   | 0.30      |         |      |               |
|      | 34.807 | 7.9268    | 0.14      |         |      |               |
| 12   | 36.661 | 71.3704   | 1.59      |         |      |               |
|      | 36.661 | 126.1906  | 2.25      |         |      |               |

# Single Injection Report



Agilent Technologies

| Name | RT     | Area     | Peak Area | Percent | Unit | Concentration |
|------|--------|----------|-----------|---------|------|---------------|
|      | 36.662 | 190.6141 | 3.55      |         |      |               |
|      | 38.917 | 13.9219  | 0.26      |         |      |               |
|      | 38.918 | 9.1784   | 0.16      |         |      |               |
|      | 40.435 | 15.6339  | 0.35      |         |      |               |
|      | 42.124 | 39.1520  | 0.70      |         |      |               |
|      | 42.124 | 42.0307  | 0.78      |         |      |               |
|      | 42.124 | 18.6802  | 0.42      |         |      |               |
|      | 44.238 | 11.0982  | 1.30      |         |      |               |
|      | 44.238 | 8.9815   | 0.17      |         |      |               |
|      | 44.239 | 36.4176  | 0.65      |         |      |               |
|      | 46.197 | 16.3244  | 0.36      |         |      |               |
|      | 46.832 | 22.1752  | 0.41      |         |      |               |
|      | 46.842 | 58.7509  | 1.31      |         |      |               |
|      | 47.668 | 57.2666  | 1.27      |         |      |               |
|      | 50.076 | 20.8737  | 0.46      |         |      |               |
|      | 50.081 | 19.9923  | 0.37      |         |      |               |
|      | 52.014 | 67.1903  | 1.49      |         |      |               |
|      | 52.650 | 15.7788  | 0.35      |         |      |               |
|      | 53.907 | 12.5616  | 0.22      |         |      |               |
|      | 53.907 | 11.8212  | 0.22      |         |      |               |
| 13   | 54.238 | 95.3523  | 2.12      |         |      |               |
|      | 54.244 | 98.0522  | 1.75      |         |      |               |
|      | 54.245 | 130.3869 | 2.42      |         |      |               |
| 14   | 54.851 | 686.2865 | 15.25     |         |      |               |
|      | 54.852 | 76.4597  | 1.36      |         |      |               |
|      | 54.853 | 66.7260  | 1.24      |         |      |               |
|      | 55.909 | 7.3229   | 0.14      |         |      |               |
|      | 56.248 | 14.8228  | 0.26      |         |      |               |
|      | 56.248 | 15.2159  | 0.28      |         |      |               |
|      | 56.733 | 29.5830  | 0.66      |         |      |               |
|      | 56.734 | 63.8937  | 1.14      |         |      |               |
|      | 56.734 | 87.0809  | 1.62      |         |      |               |
|      | 58.193 | 19.5858  | 0.44      |         |      |               |
|      | 58.438 | 6.0428   | 0.11      |         |      |               |
|      | 59.876 | 10.9262  | 0.24      |         |      |               |
|      | 60.942 | 41.4178  | 0.92      |         |      |               |



# Single Injection Report

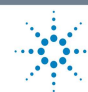

Agilent Technologies

MWD1A,Sig=250,4 Ref=off

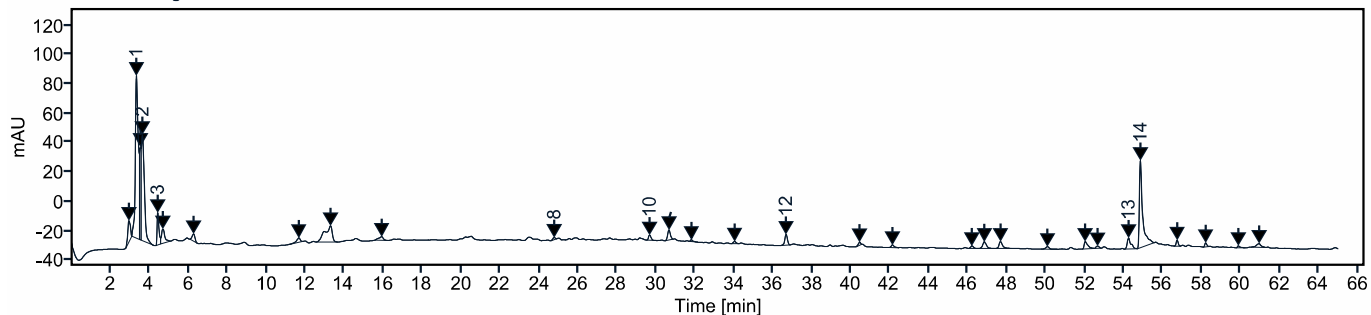

MWD1B,Sig=270,4 Ref=off

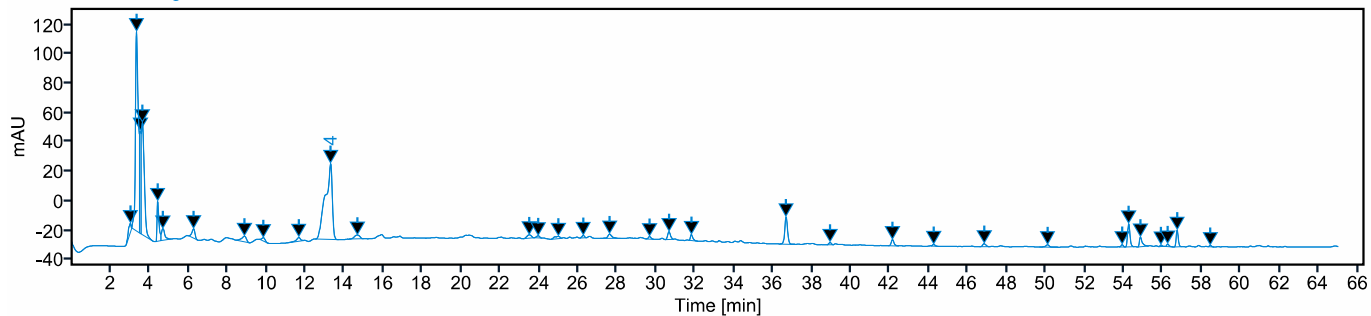

MWD1C,Sig=290,4 Ref=off

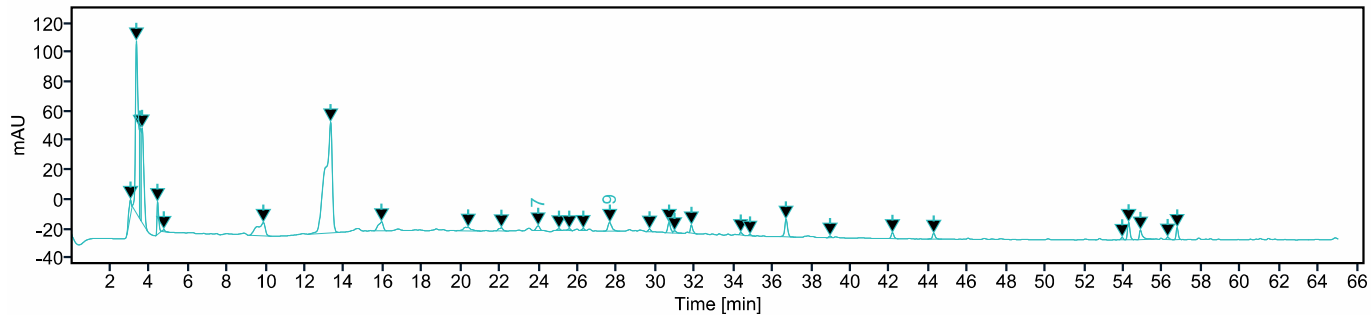

MWD1D,Sig=350,4 Ref=off

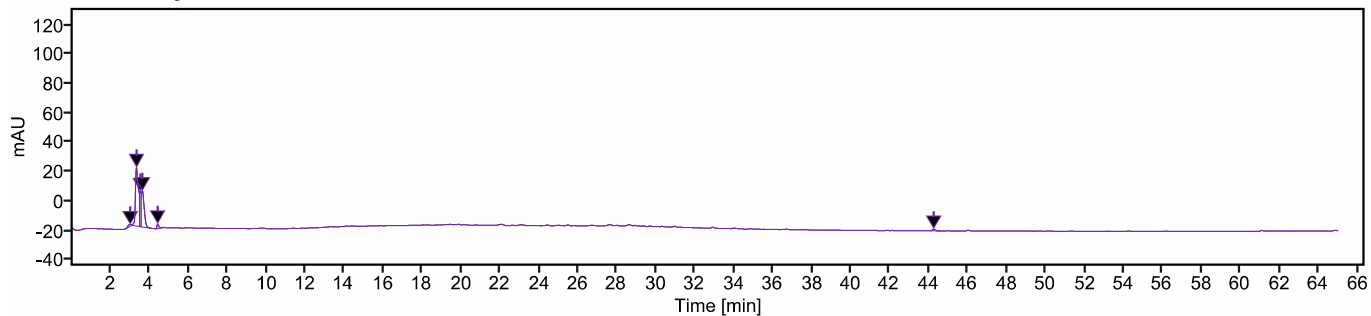

MWD1E,Sig=380,4 Ref=off

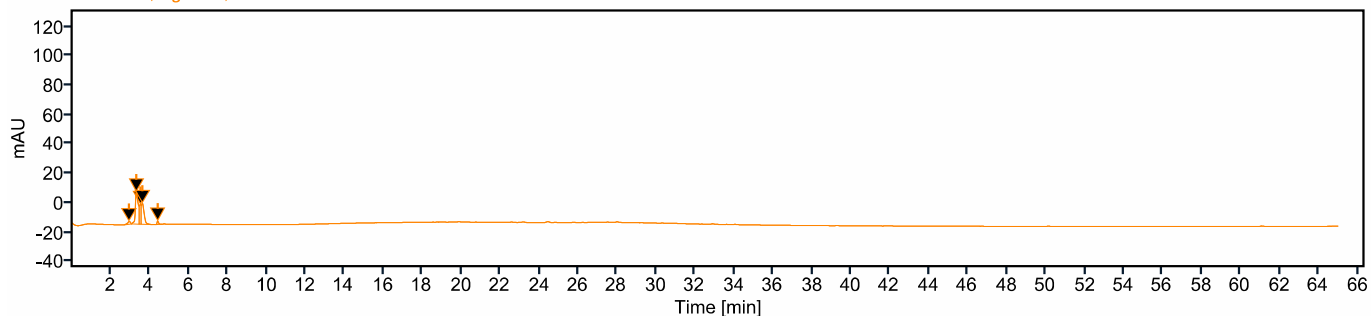

Supplement: s1 [file s1]
